# Supplementary material for: Conductive polymer-mediated 2D and 3D arrays of Mn3O4 nanoblocks and mesoporous conductive polymers as their replicas
Source: Royal Society of Chemistry journal article supplement (doi:10.1039/c5nr05912g), 2015-01-01
Supplement: c5nr05912g1.pdf [file c5nr05912g1.pdf]

## Supporting Information

### Conductive Polymer-Mediated 2D and 3D Arrays of $\text{Mn}_3\text{O}_4$ Nanoblocks and Mesoporous Conductive Polymers as Their Replicas

Yoshitaka Nakagawa, Hiroyuki Kageyama, Riho Matsumoto, Yuya Oaki, and Hiroaki Imai\*

Department of Applied Chemistry, Faculty of Science and Technology, Keio University, 3-14-1 Hiyoshi, Kohoku-ku, Yokohama 223-8522, Japan

Email: hiroaki@aplc.keio.ac.jp

#### Additional figures

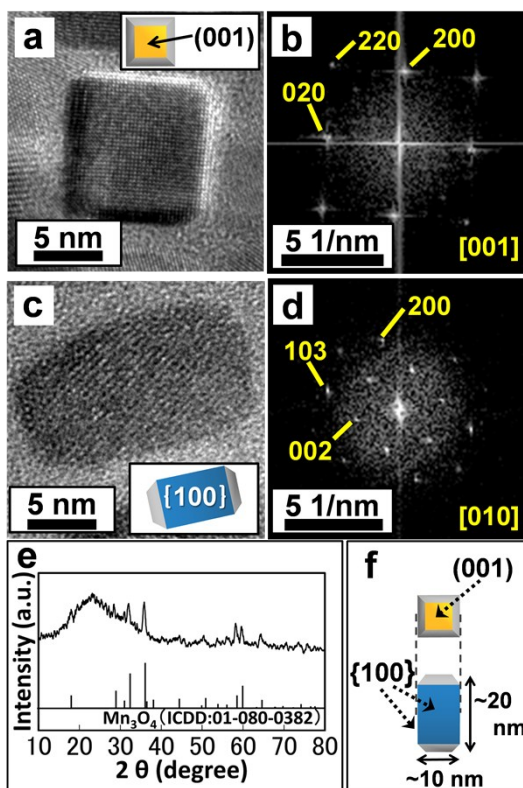

**Figure S1.** HRTEM images and FFT patterns corresponding to the lattice fringes of  $\text{Mn}_3\text{O}_4$  rectangular nanoblocks with a projection direction of  $[001]$  (a, b) and  $[100]$  (c, d). XRD pattern of the product (a broad halo at 20–30 degree is ascribed to a glass holder) (e). Schematic illustration of a standard  $\text{Mn}_3\text{O}_4$  rectangular nanoblock (f). Reproduced with permission from ref. 15. Copyright 2014 American Chemical Society.

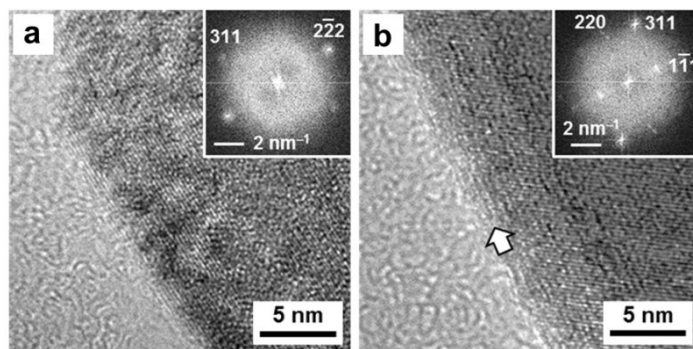

**Figure S2.** HRTEM images and corresponding FFT patterns of a commercial  $\text{Li}_4\text{Ti}_5\text{O}_{12}$  (a) and the PPy-coated samples (b). Reproduced with permission from ref. 36. Copyright 2014 Royal Society of Chemistry.

While the lattice fringes of the  $\text{Li}_4\text{Ti}_5\text{O}_{12}$  were observed throughout the nanocrystals before the PPy coating (Figure S2a), the thin amorphous layer 1 nm in the thickness was partially formed on the nanocrystals (indicated by a white arrow in Figure S2b).
